# Supplementary material
Source: PubMed Central journal article supplement (PMC2950481)

1 **Characterization of a cellobiohydrolase (MoCel6A) in *Magnaporthe oryzae***

2

3 Takahashi et al., Supplementary Materials

4

5 Content:

6

7 Fig. S1-S3

8

9 Figure Legends

10

11 Fig. S1. Rice leaves infected with *M. oryzae*. Rice leaves were sprayed with a  
12 suspension of *M. oryzae* spores and harvested 1-5 days after inoculation. The  
13 leaves were used to prepare cDNA by reverse-transcription.

14

15 Fig. S2. Preparation of recombinant proteins prepared in *M. oryzae* and *A.*  
16 *oryzae*.

17 *M. oryzae* and *A. oryzae* transformants overexpressing either MoCel6A,  
18 MoCel7A or TrCel6A were cultured in YG (0.5% yeast extract and 2% glucose)  
19 medium for 4 days at 25 °C with gentle rotation at 120 rpm. Culture medium was  
20 desalted, concentrated and applied to a His-binding resin, and then bound  
21 protein was eluted with elution buffer (50 mM sodium phosphate, pH 7.0, 50 mM  
22 NaCl, 200 mM imidazol). Crude and eluted fractions were electrophoresed on an

23 SDS-acrylamide gel and then stained with Coomassie Brilliant Blue R-250.  
24 Lanes 1, 3, 5 and 7, 5 µg of the crude fraction; lane 2, 1 µg of the eluted  
25 MoCel6A expressed in *M. oryzae*; lane 4, 1 µg of the eluted MoCel7A expressed  
26 in *M. oryzae*; lane 6, 5 µg of the eluted MoCel6A expressed in *A. oryzae*; lane 8,  
27 5 µg of the eluted TrCel6A expressed in *A. oryzae*.

28

29 Fig. S3. Amino acid alignment of fungal GH-6 family cellobiohydrolases.  
30 Amino acid sequences of cellobiohydrolases from *M. oryzae* (MoCel6A,  
31 MoCel6B and MoCel6C), *T. reesei* (AF302657), *T. viride* (AY368688),  
32 *A. fumigatus* (XP\_748511), *A. oryzae* (XM\_001825308), *H. insolens* (AB048710),  
33 *C. thermophilum* (DQ020255) and *C. globosum* (XM\_001226028) were aligned  
34 using Clustal W and standard conditions. A putative secretion signal sequence is  
35 underlined and a putative cellulose binding domain is in a box. Asterisks  
36 represent highly conserved amino acids that are proposed to be associated with  
37 substrate binding according to the previous reports (41-43). Closed circles  
38 represent highly conserved amino acids in fungal cellobiohydrolases that are  
39 absent in MoCel6A.

40 Fig. S1

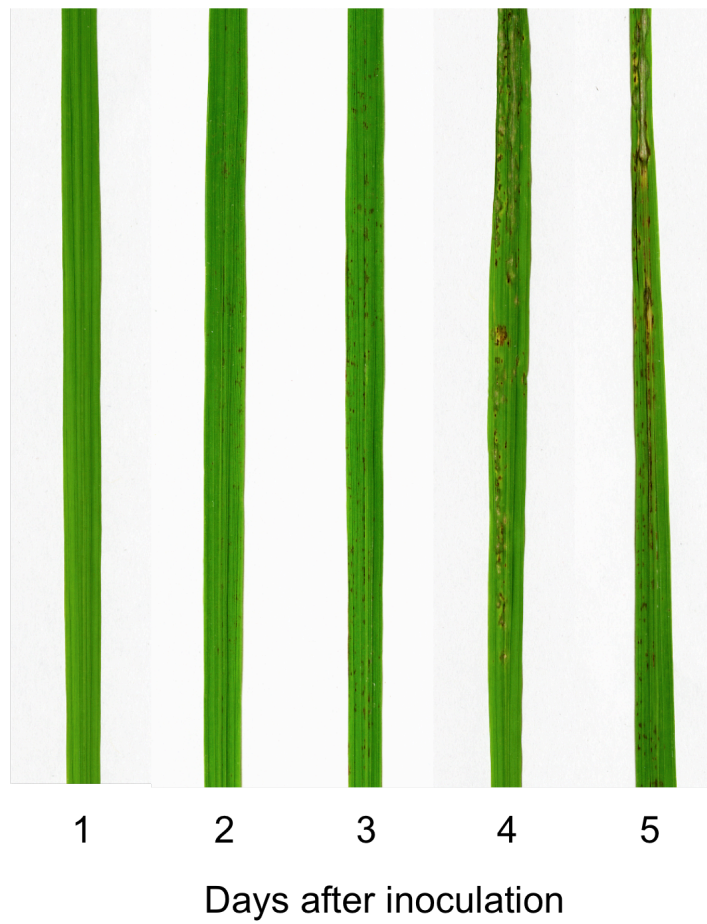

41 Fig. S2

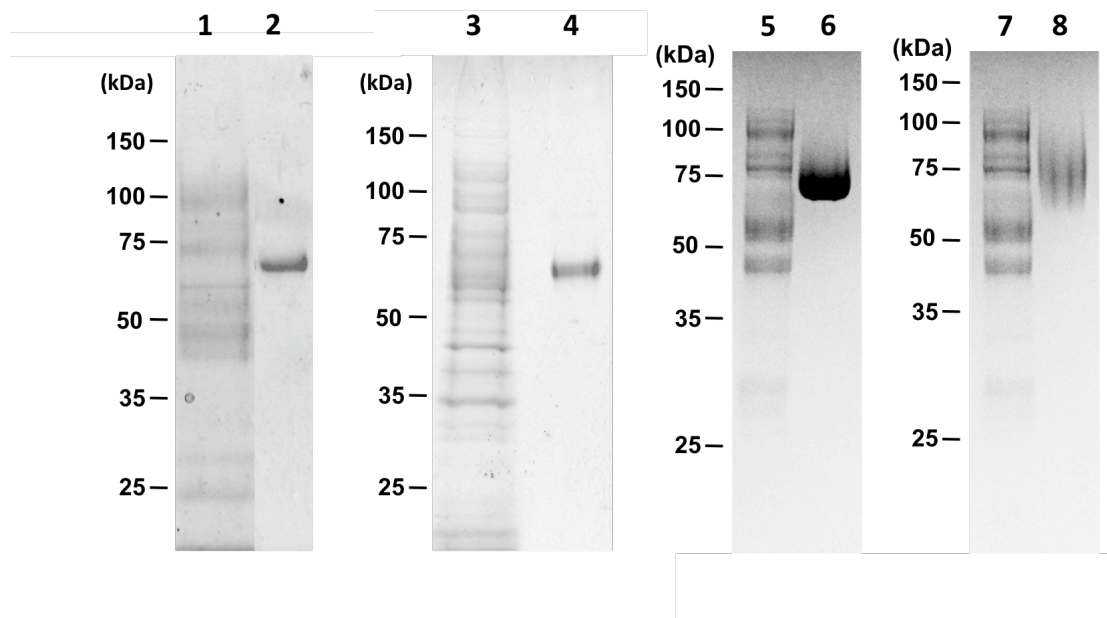

Supplement: supp_76_19_6583__1.pdf [file supp_76_19_6583__1.pdf]
